# Supplementary material for: Synthesis of aliphatic nitriles from cyclobutanone oxime mediated by sulfuryl fluoride (SO 2 F 2 )
Source: publisher site journal article supplement (doi:10.3762/bjoc.19.68), 2023-06-22

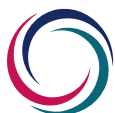

## Supporting Information

for

### Synthesis of aliphatic nitriles from cyclobutanone oxime mediated by sulfuryl fluoride (SO<sub>2</sub>F<sub>2</sub>)

Xian-Lin Chen and Hua-Li Qin

*Beilstein J. Org. Chem.* **2023**, *19*, 901–908. [doi:10.3762/bjoc.19.68](https://doi.org/10.3762/bjoc.19.68)

## Experimental information

## **Table of contents**

|                                                  |     |
|--------------------------------------------------|-----|
| 1. General information .....                     | S2  |
| 2. Optimization of the reaction conditions ..... | S3  |
| 3. General procedures .....                      | S11 |
| 4. Product characterization .....                | S20 |
| 5. References .....                              | S27 |
| 6. NMR spectra .....                             | S28 |

## 1. General information

All reactions were carried out in dried glassware. All reagents were purchased from commercial sources and used without further purification. Unless otherwise specified, NMR spectra were recorded in CDCl<sub>3</sub> on a 500 MHz (for <sup>1</sup>H), 471 MHz (for <sup>19</sup>F), 126 MHz (for <sup>13</sup>C) Bruker Avance spectrometer, and were internally referenced to solvent residual signals (note: CDCl<sub>3</sub>: δH = 7.264 ppm, δC = 77.16 ppm). The HPLC experiments were carried out on a Waters e2695 instrument (column: J&K, RP-C18, 5 μm, 4.6 × 150 mm), and the yields of the products were determined by using the corresponding pure compounds as the external standards. The coupling constants were reported in hertz (Hz). The following abbreviations were used to explain the multiplicities: s = singlet, d = doublet, t = triplet, q = quartet, m = multiplet, br = broad.

## 2. Optimization of the reaction conditions

Table S1 Screening the solvent<sup>a</sup>

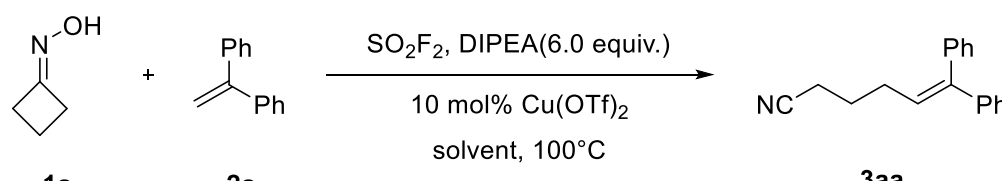

| Entry | Solvent                                       | Yield ( <b>3aa</b> , %) <sup>b</sup> |
|-------|-----------------------------------------------|--------------------------------------|
| 1     | <b>1,4-dioxane</b>                            | <b>47</b>                            |
| 2     | PhCF <sub>3</sub>                             | N.D.                                 |
| 3     | DMF                                           | 13                                   |
| 4     | NMP                                           | 23                                   |
| 5     | PhCH <sub>3</sub>                             | 12                                   |
| 6     | CH <sub>3</sub> CN                            | N.D.                                 |
| 7     | CH <sub>2</sub> Cl <sub>2</sub>               | 39                                   |
| 8     | THF                                           | N.D.                                 |
| 9     | CH <sub>2</sub> ClCH <sub>2</sub> Cl          | N.D.                                 |
| 10    | acetone                                       | N.D.                                 |
| 11    | dioxane/DMSO (1:1)                            | 21                                   |
| 12    | dioxane/PhCF <sub>3</sub> (1:1)               | 24                                   |
| 13    | dioxane/NMP (1:1)                             | 32                                   |
| 14    | dioxane/CH <sub>2</sub> Cl <sub>2</sub> (1:1) | 46                                   |

<sup>a</sup> Reaction conditions: A mixture of cyclobutanone (**1a**, 1.5 mmol, 3.0 equiv), 1,1-diphenylethylene (**2a**, 0.5 mmol), Cu(OTf)<sub>2</sub> (0.05 mmol, 10 mol %) and DIPEA (6.0 equiv) in anhydrous solvent (0.1 M) was stirred at 100 °C with a SO<sub>2</sub>F<sub>2</sub> balloon for 12 h. <sup>b</sup> The yield was determined by HPLC using pure **3aa** as the external standard (*t*<sub>R</sub> = 5.0 min, λ<sub>max</sub> = 250.0 nm, water/methanol 20:80 (v/v)). N.D. = Not detectable.

**Table S2 Screening the copper catalyst<sup>a</sup>**

Reaction scheme showing the synthesis of **3aa** from **1a** and **2a**. **1a** is cyclobutanone oxime, **2a** is 1,1-diphenylethylene, and **3aa** is 4-(2-phenylvinyl)butanenitrile. Reaction conditions:  $\text{SO}_2\text{F}_2$ , DIPEA (6.0 equiv.), 10 mol% [Cu], 1,4-dioxane, 100°C.

| Entry     | [Cu]                                                | Yield ( <b>3aa</b> , %) <sup>b</sup> |
|-----------|-----------------------------------------------------|--------------------------------------|
| 1         | Cu(OTf) <sub>2</sub>                                | 47                                   |
| 2         | CuO                                                 | N.D.                                 |
| 3         | CuF <sub>2</sub>                                    | 15                                   |
| 4         | CuI                                                 | 41                                   |
| 5         | Cu(CH <sub>3</sub> CN) <sub>4</sub> PF <sub>6</sub> | 38                                   |
| 6         | Cu power                                            | 16                                   |
| 7         | Zu Cu alloy                                         | 16                                   |
| 8         | CuCl                                                | 34                                   |
| 9         | CuBr                                                | 9                                    |
| <b>10</b> | <b>Cu<sub>2</sub>O</b>                              | <b>55</b>                            |
| 11        | CuCN                                                | 40                                   |
| 12        | /                                                   | N.D.                                 |
| 13        | CuSO <sub>4</sub>                                   | 35                                   |

<sup>a</sup> Reaction conditions: A mixture of cyclobutanone (**1a**, 1.5 mmol, 3.0 equiv), 1,1-diphenylethylene (**2a**, 0.5 mmol), copper catalyst (0.05 mmol, 10 mol %) and DIPEA (3.0 mmol, 6.0 equiv) in anhydrous 1,4-dioxane (0.1 M) was stirred at 100 °C with a  $\text{SO}_2\text{F}_2$  balloon for 12 h. <sup>b</sup> The yield was determined by HPLC using pure **3aa** as the external standard ( $t_R = 5.0$  min,  $\lambda_{\text{max}} = 250.0$  nm, water/methanol 20:80 (v/v)). N.D. = Not detectable.

**Table S3 Screening the loading of copper catalyst<sup>a</sup>**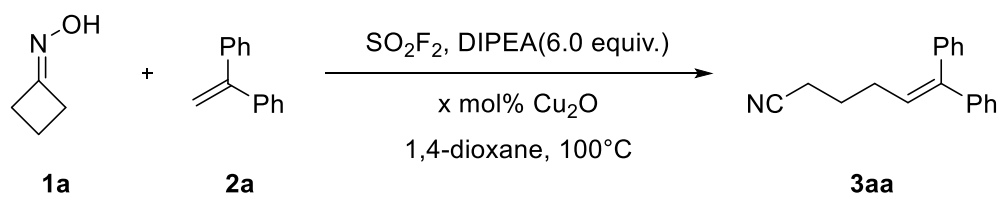

| Entry    | $\text{Cu}_2\text{O}$ (x mol %) | Yield ( <b>3aa</b> , %) <sup>b</sup> |
|----------|---------------------------------|--------------------------------------|
| 1        | 10                              | 55                                   |
| 2        | 30                              | 48                                   |
| 3        | 50                              | 61                                   |
| <b>4</b> | <b>100</b>                      | <b>72</b>                            |
| 5        | 120                             | 71                                   |
| 6        | 150                             | 66                                   |
| 7        | 200                             | 46                                   |

<sup>a</sup> Reaction conditions: A mixture of cyclobutanone (**1a**, 1.5 mmol, 3.0 equiv), 1,1-diphenylethylene (**2a**, 0.5 mmol),  $\text{Cu}_2\text{O}$  (x mol %) and DIPEA (3.0 mmol, 6.0 equiv) in anhydrous 1,4-dioxane (0.1 M) was stirred at 100 °C with a  $\text{SO}_2\text{F}_2$  balloon for 12 h.

<sup>b</sup> The yield was determined by HPLC using pure **3aa** as the external standard ( $t_{\text{R}} = 5.0$  min,  $\lambda_{\text{max}} = 250.0$  nm, water/methanol 20:80 (v/v)).

**Table S4 Screening the base<sup>a</sup>**

Reaction scheme showing the synthesis of **3aa** from **1a** and **2a**. Reagents:  $\text{SO}_2\text{F}_2$ , Base (6.0 equiv.),  $\text{Cu}_2\text{O}$  (1.0 equiv.), 1,4-dioxane,  $100^\circ\text{C}$ .

| Entry     | Base                                       | Yield ( <b>3aa</b> , %) <sup>b</sup> |
|-----------|--------------------------------------------|--------------------------------------|
| 1         | $\text{K}_2\text{CO}_3$                    | 40                                   |
| 2         | $\text{Et}_3\text{N}$                      | 37                                   |
| 3         | DBU                                        | N.D.                                 |
| 4         | DIPEA                                      | 72                                   |
| 5         | $\text{Na}_2\text{CO}_3$                   | 62                                   |
| 6         | $\text{Cs}_2\text{CO}_3$                   | 29                                   |
| 7         | $\text{NaHCO}_3$                           | N.D.                                 |
| 8         | TMEDA                                      | 51                                   |
| 9         | $\text{Li}_2\text{CO}_3$                   | N.D.                                 |
| 10        | $\text{CH}_3\text{OK}$                     | 11                                   |
| 11        | KF                                         | N.D.                                 |
| <b>12</b> | <b><math>\text{CH}_3\text{COOK}</math></b> | <b>75</b>                            |
| 13        | <i>t</i> -BuONa                            | N.D.                                 |
| 14        | PMDETA                                     | 7                                    |

<sup>a</sup> Reaction conditions: A mixture of cyclobutanone (**1a**, 1.5 mmol, 3.0 equiv), 1,1-diphenylethylene (**2a**, 0.5 mmol),  $\text{Cu}_2\text{O}$  (0.5 mmol, 1.0 equiv) and Base (3.0 mmol, 6.0 equiv) in anhydrous 1,4-dioxane (0.1 M) was stirred at  $100^\circ\text{C}$  with a  $\text{SO}_2\text{F}_2$  balloon for 12 h. <sup>b</sup> The yield was determined by HPLC using pure **3aa** as the external standard ( $t_{\text{R}} = 5.0$  min,  $\lambda_{\text{max}} = 250.0$  nm, water/methanol 20:80 (v/v)). N.D. = Not detectable.

**Table S5 Screening the loading of base<sup>a</sup>**

Reaction scheme: Cyclobutanone oxime (**1a**) + 1,1-diphenylethylene (**2a**)  $\xrightarrow[\text{1,4-dioxane, 100}^\circ\text{C}]{\text{SO}_2\text{F}_2, \text{CH}_3\text{COOK (x equiv.)}, \text{Cu}_2\text{O (1.0 equiv.)}}$  1,1-diphenylbut-3-en-1-yn-3-ene (**3aa**)

| Entry    | CH <sub>3</sub> COOK (x equiv) | Yield ( <b>3aa</b> , %) <sup>b</sup> |
|----------|--------------------------------|--------------------------------------|
| 1        | 2.0                            | 21                                   |
| 2        | 3.0                            | 24                                   |
| 3        | 4.0                            | 23                                   |
| 4        | 5.0                            | 55                                   |
| 5        | 6.0                            | 75                                   |
| 6        | 7.0                            | 65                                   |
| 7        | 8.0                            | 72                                   |
| 8        | 9.0                            | 79                                   |
| <b>9</b> | <b>10.0</b>                    | <b>83</b>                            |
| 10       | 11.0                           | 83                                   |
| 11       | 12.0                           | 84                                   |

<sup>a</sup> Reaction conditions: A mixture of cyclobutanone (**1a**, 1.5 mmol, 3.0 equiv), 1,1-diphenylethylene (**2a**, 0.5 mmol), Cu<sub>2</sub>O (0.5 mmol, 1.0 equiv) and CH<sub>3</sub>COOK (x equiv) in anhydrous 1,4-dioxane (0.1 M) was stirred at 100 °C with a SO<sub>2</sub>F<sub>2</sub> balloon for 12 h.

<sup>b</sup> The yield was determined by HPLC using pure **3aa** as the external standard (*t*<sub>R</sub> = 5.0 min, λ<sub>max</sub> = 250.0 nm, water/methanol 20:80 (v/v)). N.D. = Not detectable.



**Table S6 Screening the loading of 1a<sup>a</sup>**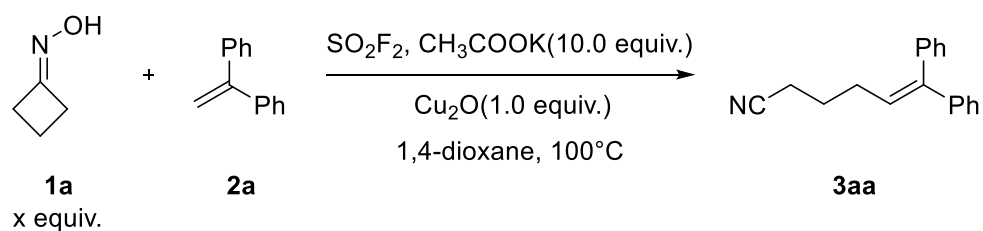

| Entry    | <b>1a</b> (x equiv) | Yield ( <b>3aa</b> , % ) <sup>b</sup> |
|----------|---------------------|---------------------------------------|
| 1        | 0.33                | N.D.                                  |
| 2        | 0.5                 | N.D.                                  |
| 3        | 1.0                 | 15                                    |
| 4        | 1.5                 | 35                                    |
| 5        | 2.0                 | 50                                    |
| <b>6</b> | <b>3.0</b>          | <b>83</b>                             |
| 7        | 5.0                 | 76                                    |

<sup>a</sup> Reaction conditions: A mixture of cyclobutanone (**1a**, x equiv), 1,1-diphenylethylene (**2a**, 0.5 mmol), Cu<sub>2</sub>O (0.5 mmol, 1.0 equiv) and CH<sub>3</sub>COOK (5.0 mmol, 10.0 equiv) in anhydrous 1,4-dioxane (0.1 M) was stirred at 100 °C with a SO<sub>2</sub>F<sub>2</sub> balloon for 12 h.

<sup>b</sup>The yield was determined by HPLC using pure **3aa** as the external standard (*t*<sub>R</sub> = 5.0 min, λ<sub>max</sub> = 250.0 nm, water/methanol 20:80 (v/v)). N.D. = Not detectable.

**Table S7 Screening the reaction temperature<sup>a</sup>**

Reaction scheme showing the conversion of cyclobutanone oxime (**1a**) and 1,1-diphenylethylene (**2a**) to 3-phenylbut-3-enenitrile (**3aa**). Reagents:  $\text{SO}_2\text{F}_2$ ,  $\text{CH}_3\text{COOK}$  (10.0 equiv.),  $\text{Cu}_2\text{O}$  (1.0 equiv.), 1,4-dioxane, T, 24 h.

| Entry    | Temperature (°C) | Yield ( <b>3aa</b> , %) <sup>b</sup> |
|----------|------------------|--------------------------------------|
| 1        | 80               | 54                                   |
| <b>2</b> | <b>100</b>       | <b>83</b>                            |
| 3        | 120              | 64                                   |

<sup>a</sup> Reaction conditions: A mixture of cyclobutanone (**1a**, 1.0 mmol, 3.0 equiv), 1,1-diphenylethylene (**2a**, 0.5 mmol),  $\text{Cu}_2\text{O}$  (0.5 mmol, 1.0 equiv) and  $\text{CH}_3\text{COOK}$  (5.0 mmol, 10.0 equiv) in anhydrous 1,4-dioxane (0.1 M) was stirred at T with a  $\text{SO}_2\text{F}_2$  balloon for 12 h. <sup>b</sup> The yield was determined by HPLC using pure **3aa** as the external standard ( $t_{\text{R}} = 5.0$  min,  $\lambda_{\text{max}} = 250.0$  nm, water/methanol 20:80 (v/v)).

**Table S8 Screening the reaction time<sup>a</sup>**

Reaction scheme showing the conversion of cyclobutanone oxime (**1a**) and 1,1-diphenylethylene (**2a**) to 3aa. Reagents: SO<sub>2</sub>F<sub>2</sub>, CH<sub>3</sub>COOK (10.0 equiv.), Cu<sub>2</sub>O (1.0 equiv.), 1,4-dioxane, 100 °C, t hours.

| Entry | Time (h) | Yield ( <b>3aa</b> , %) <sup>b</sup> |
|-------|----------|--------------------------------------|
| 1     | 8        | 60                                   |
| 2     | 12       | 83                                   |
| 3     | 16       | 79                                   |
| 4     | 24       | 81                                   |

<sup>a</sup> Reaction conditions: A mixture of cyclobutanone (**1a**, 1.0 mmol, 3.0 equiv), 1,1-diphenylethylene (**2a**, 0.5 mmol), Cu<sub>2</sub>O (100 mol %) and CH<sub>3</sub>COOK (10.0 equiv) in anhydrous 1,4-dioxane (0.1 M) was stirred at 100 °C with a SO<sub>2</sub>F<sub>2</sub> balloon for t hours.

<sup>b</sup> The yield was determined by HPLC using pure **3aa** as the external standard (*t*<sub>R</sub> = 5.0 min, λ<sub>max</sub> = 250.0 nm, water/methanol 20:80 (v/v)).

### 3. General procedures

#### 3.1 General procedures for synthesis of the compounds 1<sup>1,2</sup>

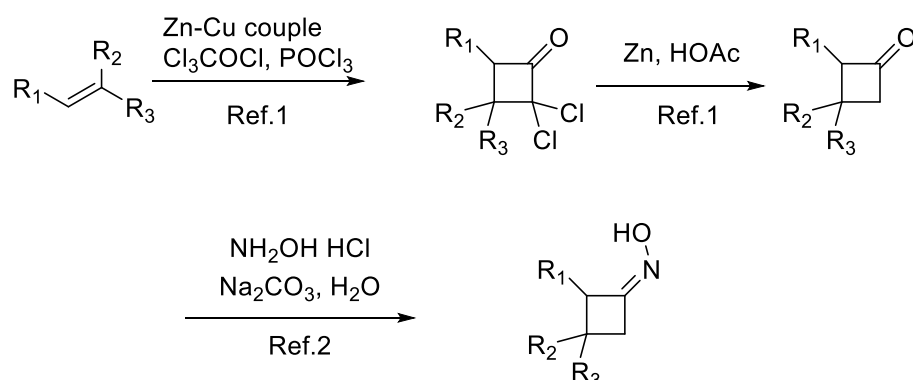

Cyclobutanone derivatives, were either commercially available or produced by the reduction of 2,2-dichlorocyclobutanones synthesized from the corresponding alkenes by the reported procedure<sup>2</sup>. The following experimental procedure is typical: To a 50 mL three-necked flask under argon were added alkene derivative (5.0 mmol, 1.0 equiv), zinc–copper couple (960 mg, 15.0 mmol, 3.0 equiv), and anhydrous ether (10 mL). To this was added a solution of trichloroacetyl chloride (1.12 mL, 10.0 mmol, 2.0 equiv) and phosphorus oxychloride (0.51 mL, 5.5 mmol, 1.1 equiv) in ether (10 mL) over 1 h through an addition funnel. The suspension was stirred overnight at reflux. The resulting mixture was filtered through a pad of Celite and washed with ether (20 mL). The organic solution was successively washed with water (30 mL), a saturated aqueous solution of NaHCO<sub>3</sub> (30 mL) and brine (30 mL), and dried over MgSO<sub>4</sub>. Then, the solution was filtered, concentrated and used in the next step without further purification.

A mixture of 2,2-dichlorocyclobutanones (1.0 equiv) and zinc dust (4.0 equiv) in acetic acid (10 mL) was stirred at room temperature for 2 h and then heated at 80 °C for 5 h. The resulting mixture was allowed to cool to room temperature, then, the solution was diluted with water (30 mL) and extracted with ether (3 × 20 mL). The organic phase was washed successively with a saturated solution of aqueous NaHCO<sub>3</sub> (3 × 30 mL), water (30 mL) and brine (30 mL), then dried over MgSO<sub>4</sub> and concentrated in vacuum. The crude material was then purified by flash chromatography eluting with a mixture of petroleum ether and ethyl acetate to afford various

cyclobutanones.

To a stirred solution of the cyclobutanone (1.0 equiv) in H<sub>2</sub>O (0.5 M) was added hydroxylamine hydrochloride (2.0 equiv) and Na<sub>2</sub>CO<sub>3</sub> (0.5 equiv) at 45 °C. After stirring for 3 h, the residue was diluted with water and extracted with EtOAc. The aqueous layer was extracted with EtOAc and the combined organic extracts were washed with brine, dried over MgSO<sub>4</sub>, and evaporated under reduced pressure to give the crude material, which was used in the next step without further purification.

### 3.2 General procedures for synthesis of the compounds 3

#### Method A:

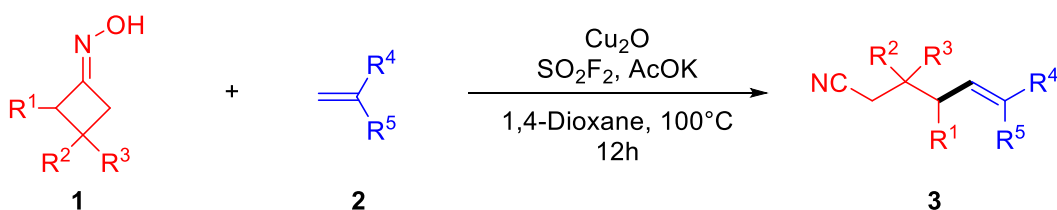

Cu<sub>2</sub>O (1.0 mmol), AcOK (10.0 mmol), the cyclobutanone oxime derivative (3.0 mmol), the alkene (1.0 mmol) and extra dry 1,4-dioxane (10 mL) were added to a 50 mL oven-dried round-bottomed flask that was equipped with a stirring bar. The flask was fitted with a plastic stopper and SO<sub>2</sub>F<sub>2</sub> gas was introduced into the stirring reaction mixture by bubbling from a SO<sub>2</sub>F<sub>2</sub> balloon. The mixture was stirred strongly at 100 °C for 12 h, then cooled to room temperature upon completion. After that, the reaction mixture was filtered with diatomite to remove insoluble substances such as copper catalyst and excessive base, washed by ethyl acetate. Then, the reaction mixture was diluted with water and extracted with ethyl acetate (3 × 15 mL) and the combined organic layers were dried over anhydrous sodium sulfate, filtered and concentrated under reduced pressure. The residue was purified by column chromatography on silica gel to afford the desired nitriles.

**Attention:** SO<sub>2</sub>F<sub>2</sub> has certain inhalation toxicity, please operate in fume hood.

The SO<sub>2</sub>F<sub>2</sub> bottle should be stored in a cool, dry, and well ventilated place.

**Method B:**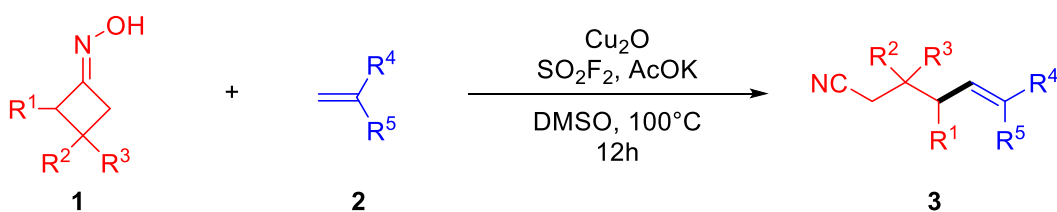

Some substances with low yields have higher yields using Method B.  $\text{Cu}_2\text{O}$  (1.0 mmol), AcOK (10.0 mmol), the cyclobutanone oxime derivative (3.0 mmol), the alkene (1.0 mmol) and extra dry DMSO (10 mL) were added to a 50 mL oven-dried round-bottomed flask that was equipped with a stirring bar. The flask was fitted with a plastic stopper and  $\text{SO}_2\text{F}_2$  gas was introduced into the stirring reaction mixture by bubbling from a  $\text{SO}_2\text{F}_2$  balloon. The mixture was stirred strongly at  $100^\circ\text{C}$  for 12 h, then cooled to room temperature upon completion. After that, the reaction mixture was diluted with water and filtered with diatomite, washed by ethyl acetate. Then, the reaction mixture was extracted with ethyl acetate ( $3 \times 15$  mL) and the combined organic layers were dried over anhydrous sodium sulfate, filtered and concentrated under reduced pressure. The residue was purified by column chromatography on silica gel to afford the desired nitriles.

**Pictures of the procedures for synthesis of the compounds 3:**

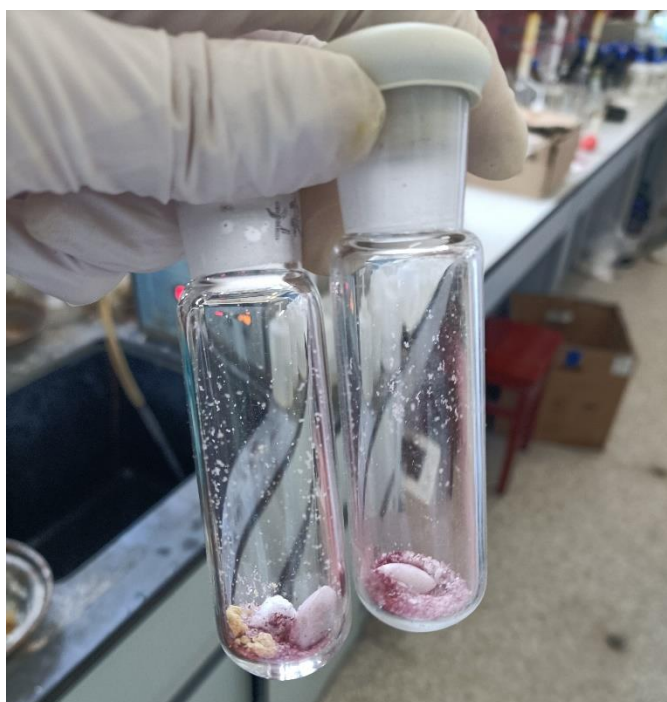

Figure S1: First, add all solid materials into an oven-dried tube or flask

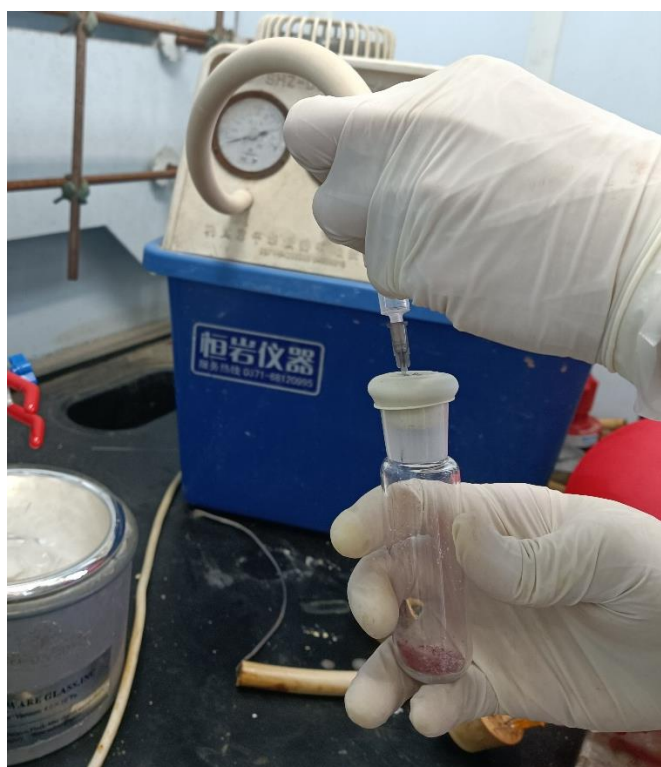

Figure S2: Using a vacuum pump to remove air



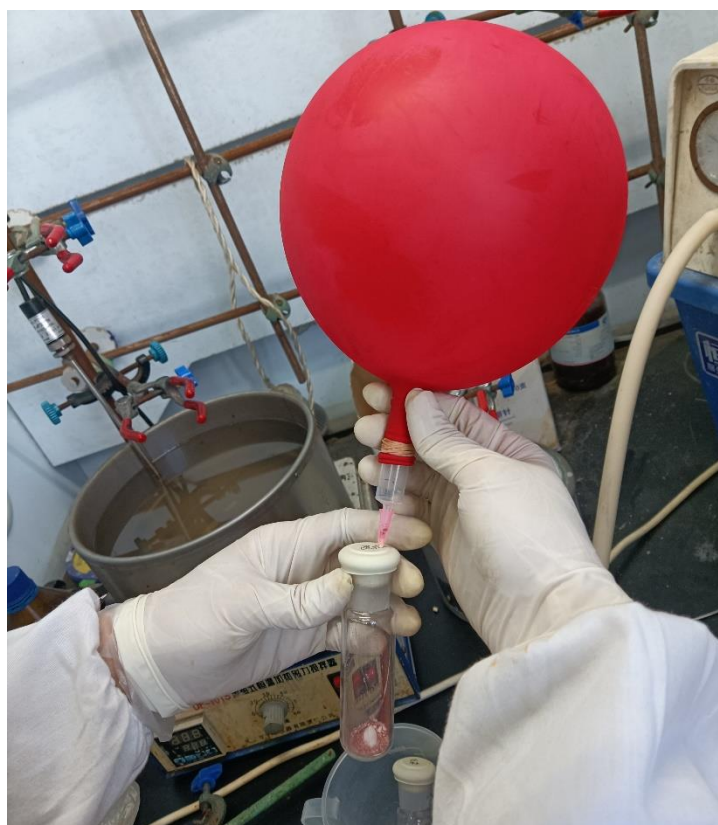

Figure S3: Bubbling from a  $\text{SO}_2\text{F}_2$  balloon, or extracting and exchanging air for three times.

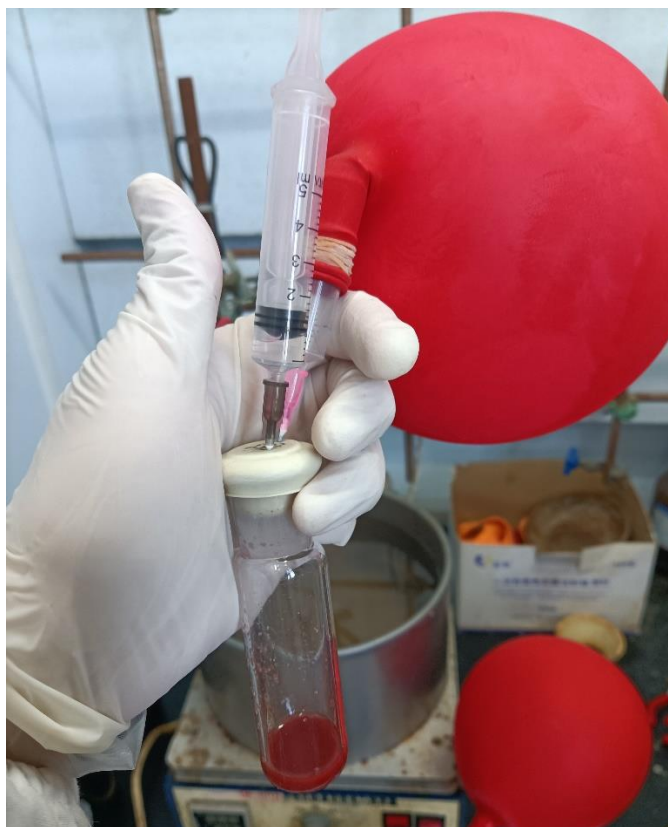

Figure S4: Add all liquid materials into the reaction vessel.

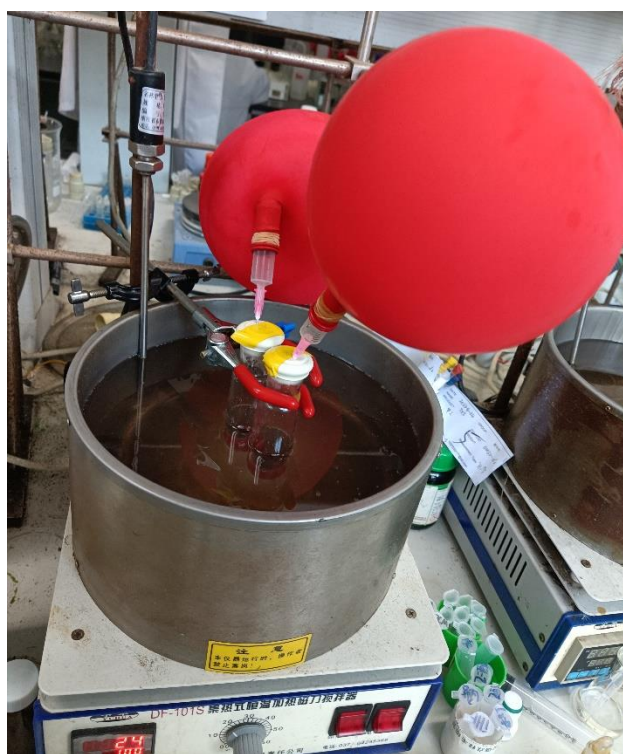

Figure S5: Seal the pinholes with insulative tape and vacuum grease.

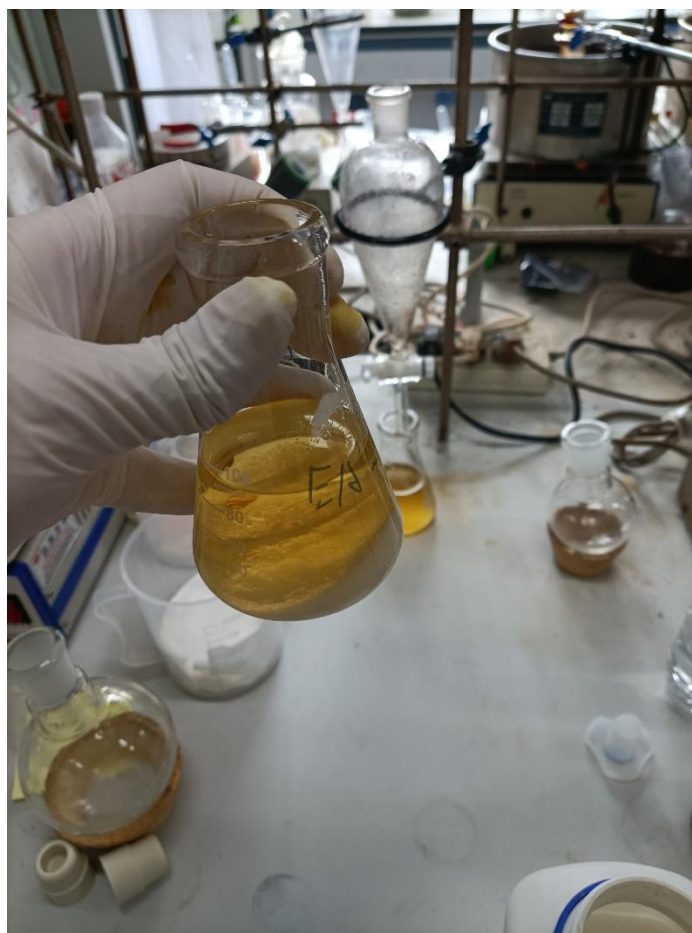

Figure S6: After the reaction is finished, extract with EA/water, take the EA layer and dry with anhydrous  $\text{Na}_2\text{SO}_4$ .

### 3.3 General procedures of mechanism investigation (a)

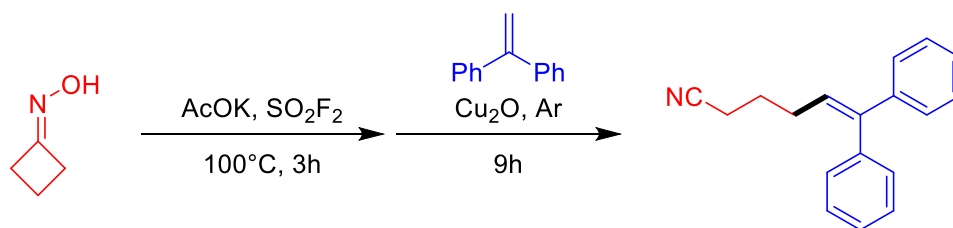

$\text{AcOK}$  (10.0 mmol), cyclobutanone oxime (3.0 mmol), and extra dry 1,4-dioxane (10 mL) were added to a 50 mL oven-dried round-bottomed flask that was equipped with a stirring bar. The flask was fitted with a plastic stopper and  $\text{SO}_2\text{F}_2$  gas was introduced into the stirring reaction mixture by bubbling from a  $\text{SO}_2\text{F}_2$  balloon. The mixture was stirred strongly at  $100^\circ\text{C}$  for 3 h, then  $\text{Cu}_2\text{O}$  (1.0 mmol), 1,1-diphenylethylene (1.0 mmol) were added to the reaction mass. Argon was introduced into the stirring reaction mixture by bubbling from an argon balloon. Keep stirred at  $100^\circ\text{C}$  for another 9 h. After that, the yield of the product was detected by HPLC using pure **3aa** as the external standard ( $t_{\text{R}} = 5.017$  min,  $\lambda_{\text{max}} = 250.0$  nm, water/methanol 20:80 (v/v)), giving a yield of 45%.

### 3.4 General procedures of mechanism investigation (b)

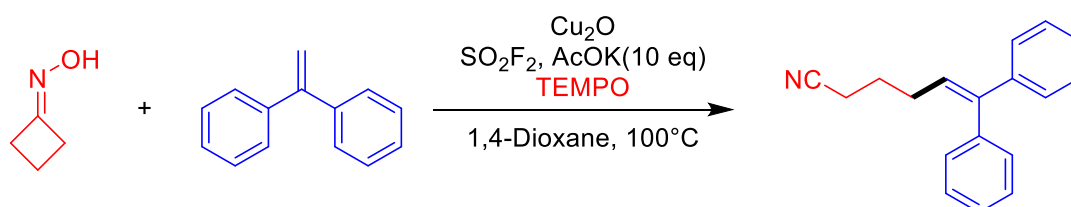

$\text{Cu}_2\text{O}$  (1.0 mmol),  $\text{AcOK}$  (10.0 mmol), cyclobutanone oxime (3.0 mmol), 1,1-diphenylethylene (1.0 mmol), TMEPO (1.0 or 2.0 mmol) and extra dry 1,4-dioxane (10 mL) were added to a 50 mL oven-dried round-bottomed flask that was equipped with a stirring bar. The flask was fitted with a plastic stopper and  $\text{SO}_2\text{F}_2$  gas was introduced into the stirring reaction mixture by bubbling from a  $\text{SO}_2\text{F}_2$  balloon. The mixture was stirred strongly at  $100^\circ\text{C}$  for 12 h, then cooled to room temperature upon completion. After that, the yield of the reaction was detected by HPLC using pure **3aa** as the external standard ( $t_{\text{R}} = 5.017$  min,  $\lambda_{\text{max}} = 250.0$  nm, water/methanol 20:80 (v/v)).

## 4. Product characterization

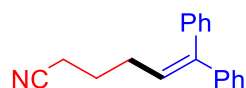

**3aa**

### *(E)*-6,6-Diphenylhex-5-enitrile (**3aa**)

General procedures for synthesis of the compounds 3, Method A: **3aa** (206 mg, 83%), yellow oil. The NMR data is identical to that reported in literature<sup>3</sup>. <sup>1</sup>H NMR (500 MHz, CDCl<sub>3</sub>)  $\delta$  7.41 – 7.38 (m, 2H), 7.35 – 7.32 (m, 1H), 7.29 – 7.22 (m, 5H), 7.17 – 7.16 (m, 2H), 6.02 (t, J = 7.5 Hz, 1H), 2.33 – 2.25 (m, 4H), 1.84 – 1.78 (m, 2H);

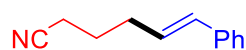

**3ab**

### *(E)*-6-Phenylhex-5-enitrile (**3ab**)

General procedures for synthesis of the compounds 3, Method B: **3ab** (117 mg, 68%), yellow oil. The NMR data is identical to that reported in literature<sup>3</sup>. <sup>1</sup>H NMR (500 MHz, CDCl<sub>3</sub>)  $\delta$  7.36 – 7.30 (m, 5H), 6.47 (d, J = 16.0 Hz, 1H), 6.17 – 6.11 (m, 1H), 2.41 – 2.38 (m, 4H), 1.89 – 1.83 (m, 2H);

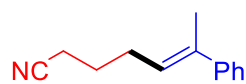

**3ac**

### *(E)*-6-Phenylhept-5-enitrile (**3ac**)

General procedures for synthesis of the compounds 3, Method A: **3ac** (121 mg, 66%), yellow oil. The NMR data is identical to that reported in literature<sup>3</sup>. <sup>1</sup>H NMR (500 MHz, CDCl<sub>3</sub>)  $\delta$  7.38 – 7.37 (m, 2H), 7.34 – 7.31 (m, 2H), 7.25 – 7.22 (m, 1H), 5.71 – 5.68 (m, 1H), 2.42 – 2.37 (m, 4H), 2.07 (s, 3H), 1.87 – 1.81 (m, 2H);

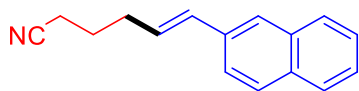

**3ad**

***(E)-6-(Naphthalen-2-yl)hex-5-enitrile (3ad)***

General procedures for synthesis of the compounds 3, Method A: **3ad** (125 mg, 56%), white solid. The NMR data is identical to that reported in literature<sup>4</sup>. <sup>1</sup>H NMR (500 MHz, CDCl<sub>3</sub>) δ 7.81 – 7.78 (m, 3H), 7.70 (s, 1H), 7.57 (dd, J<sub>1</sub> = 8.5 Hz, J<sub>2</sub> = 1.5 Hz, 1H), 7.47 – 7.44 (m, 2H), 6.63 (d, J = 16.0 Hz, 1H), 6.30 – 6.24 (m, 1H), 2.47 – 2.41 (m, 4H), 1.92 – 1.86 (m, 2H);

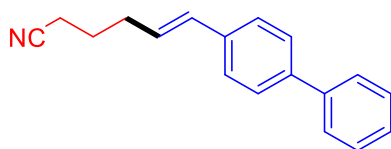

**3ae**

***(E)-6-([1,1'-Biphenyl]-4-yl)hex-5-enitrile (3ae)***

General procedures for synthesis of the compounds 3, Method A: **3ae** (153 mg, 62%), yellow solid. The NMR data is identical to that reported in literature<sup>5</sup>. <sup>1</sup>H NMR (500 MHz, CDCl<sub>3</sub>) δ 7.60 (d, J = 7.5 Hz, 2H), 7.56 (d, J = 8.0 Hz, 2H), 7.46 – 7.43 (m, 4H), 7.35 (t, J = 7.5 Hz, 1H), 6.51 (d, J = 15.5 Hz, 1H), 6.22 – 6.16 (m, 1H), 2.44 – 2.40 (m, 4H), 1.90 – 1.85 (m, 2H);

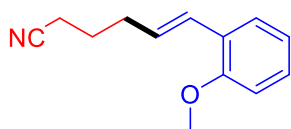

**3af**

***(E)-6-(2-Methoxyphenyl)hex-5-enitrile (3af)***

General procedures for synthesis of the compounds 3, Method B: **3af** (125 mg, 62%), yellow oil. The NMR data is identical to that reported in literature<sup>5</sup>. <sup>1</sup>H NMR (500 MHz, CDCl<sub>3</sub>) δ 7.42 – 7.40 (m, 1H), 7.24 – 7.20 (m, 1H), 6.93 (t, J = 7.5 Hz, 1H), 6.87 (d, J = 8.0 Hz, 1H), 6.78 (d, J = 16.0 Hz, 1H), 6.17 – 6.11 (m, 1H), 3.85 (s, 3H), 2.42 – 2.38 (m, 4H), 1.89-1.83 (m, 2H).

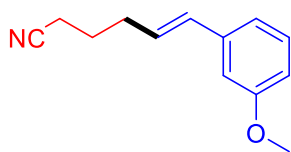

**3ag**

***(E)-6-(3-Methoxyphenyl)hex-5-enitrile (3ag)***

General procedures for synthesis of the compounds 3, Method B: **3ag** (106 mg, 52%), yellow oil. The NMR data is identical to that reported in literature<sup>5</sup>. <sup>1</sup>H NMR (500 MHz, CDCl<sub>3</sub>) δ 7.23 (t, J = 8.0 Hz, 1H), 6.95 (d, J = 7.5 Hz, 1H), 6.89 (s, 1H), 6.80 – 6.78 (m, 1H), 6.44 (d, J = 16.0 Hz, 1H), 6.16 – 6.10 (m, 1H), 3.82 (s, 3H), 2.41 – 2.37 (m, 4H), 1.88 – 1.83 (m, 2H).

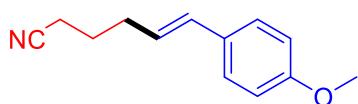

**3ah**

***(E)-6-(4-Methoxyphenyl)hex-5-enitrile (3ah)***

General procedures for synthesis of the compounds 3, Method B: **3ah** (128 mg, 63%), yellow oil. The NMR data is identical to that reported in literature<sup>5</sup>. <sup>1</sup>H NMR (500 MHz, CDCl<sub>3</sub>) δ 7.29 – 7.28 (m, 2H), 6.87 – 6.84 (m, 2H), 6.40 (d, J = 16.0 Hz, 1H), 6.01 – 5.95 (m, 1H), 3.80 (s, 3H), 2.40 – 2.34 (m, 4H), 1.86 – 1.81 (m, 2H).

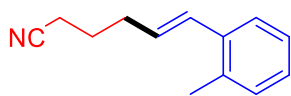

**3ai**

***(E)-6-(2-Methylphenyl)hex-5-enitrile (3ai)***

General procedures for synthesis of the compounds 3, Method B: **3ai** (118 mg, 64%), yellow oil. The NMR data is identical to that reported in literature<sup>5</sup>. <sup>1</sup>H NMR (500 MHz, CDCl<sub>3</sub>) δ 7.41 – 7.40 (m, 1H), 7.16 – 7.04 (m, 3H), 6.68 (d, J = 16.0 Hz, 1H), 6.03 – 5.97 (m, 1H), 2.43 – 2.40 (m, 4H), 2.35 (s, 3H), 1.90 – 1.84 (m, 2H);

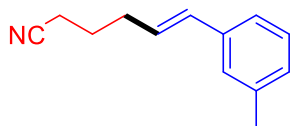

**3aj**

***(E)*-6-(3-Methylphenyl)hex-5-enitrile (3aj)**

General procedures for synthesis of the compounds 3, Method B: **3aj** (102 mg, 55%), yellow oil. The NMR data is identical to that reported in literature.<sup>5</sup> <sup>1</sup>H NMR (500 MHz, CDCl<sub>3</sub>) δ 7.10 (t, J = 7.5 Hz, 1H), 7.07 – 7.04(m, 2H), 6.96 – 6.93 (m, 1H), 6.34 (d, J = 15.5 Hz, 1H), 6.05 – 5.99 (m, 1H), 2.30 – 2.28 (m, 4H), 2.25 (s, 3H), 1.78 – 1.72 (m, 2H);

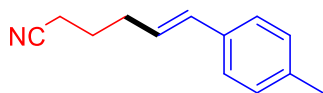

**3ak**

***(E)*-6-(4-Methylphenyl)hex-5-enitrile (3ak)**

General procedures for synthesis of the compounds 3, Method B: **3ak** (67 mg, 36%), yellow oil. The NMR data is identical to that reported in literature<sup>5</sup>. <sup>1</sup>H NMR (500 MHz, CDCl<sub>3</sub>) δ 7.24 (d, J = 8.0 Hz, 2H), 7.10 (d, J = 10.0 Hz, 2H), 6.43 (d, J = 16.0 Hz, 1H), 6.10 – 6.04 (dt, J<sub>1</sub> = 15.5 Hz, J<sub>2</sub> = 7.5 Hz, 1H), 2.40 – 2.37 (m, 4H), 2.33 (s, 3H), 1.87 – 1.82 (m, 2H);

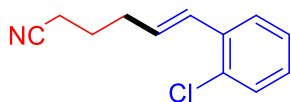

**3al**

***(E)*-6-(2-Chlorophenyl)hex-5-enitrile (3al)**

General procedures for synthesis of the compounds 3, Method B: **3al** (41 mg, 20%), yellow oil. The NMR data is identical to that reported in literature<sup>5</sup>. <sup>1</sup>H NMR (500 MHz, CDCl<sub>3</sub>) δ 7.49 (dd, J<sub>1</sub> = 8.0 Hz, J<sub>2</sub> = 2.0 Hz, 1H), 7.36 – 7.35 (m, 1H), 7.21 – 7.15 (m, 2H), 6.83 (d, J = 16.0 Hz, 1H), 6.12 (dt, J<sub>1</sub> = 16.0 Hz, J<sub>2</sub> = 7.0 Hz, 1H), 2.44 – 2.40 (m, 4H), 1.90 – 1.87 (m, 2H);



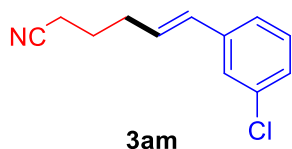

***(E)*-6-(3-Chlorophenyl)hex-5-enitrile (3am)**

General procedures for synthesis of the compounds 3, Method B: **3am** (66 mg, 32%), yellow oil. The NMR data is identical to that reported in literature<sup>5</sup>. <sup>1</sup>H NMR (500 MHz, CDCl<sub>3</sub>) δ 7.33 (s, 1H), 7.25 – 7.17 (m, 3H), 6.41 (d, *J* = 16.0 Hz, 1H), 6.15 (dt, *J*<sub>1</sub> = 15.5 Hz, *J*<sub>2</sub> = 7.0 Hz, 1H), 2.42 – 2.37 (m, 4H), 1.88 – 1.82 (m, 2H);

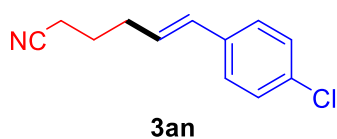

***(E)*-6-(4-Chlorophenyl)hex-5-enitrile (3an)**

General procedures for synthesis of the compounds 3, Method B: **3an** (98 mg, 48%), yellow oil. The NMR data is identical to that reported in literature<sup>5</sup>. <sup>1</sup>H NMR (500 MHz, CDCl<sub>3</sub>) δ 7.31 – 7.24 (m, 4H), 6.42 (d, *J* = 16.0 Hz, 1H), 6.14 – 6.10 (m, 1H), 2.41 – 2.37 (m, 4H), 1.88 – 1.84 (m, 2H);

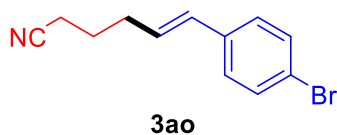

***(E)*-6-(4-Bromophenyl)hex-5-enitrile (3ao)**

General procedures for synthesis of the compounds 3, Method B: **3ao** (105 mg, 42%), yellow oil. The NMR data is identical to that reported in literature<sup>5</sup>. <sup>1</sup>H NMR (500 MHz, CDCl<sub>3</sub>) δ 7.46 – 7.39 (m, 2H), 7.23 – 7.18 (m, 2H), 6.40 (d, *J* = 16.0 Hz, 1H), 6.16 – 6.09 (m, 1H), 2.41 – 2.36 (m, 4H), 1.87 – 1.84 (m, 2H);

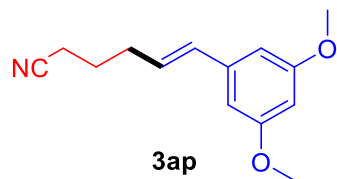

***(E)*-6-(3,5-Dimethoxyphenyl)hex-5-enitrile (3ap)**

General procedures for synthesis of the compounds 3, Method B: **3ap** (144 mg, 62%), yellow oil. The NMR data is identical to that reported in literature<sup>6</sup>. <sup>1</sup>H NMR (500 MHz, CDCl<sub>3</sub>) 6.98 (s, 2H), 6.89 (s, 1H), 6.41 (d, *J* = 16.0 Hz, 1H), 6.14 – 6.08 (m, 1H), 2.41 – 2.36 (m, 4H), 2.31 (s, 6H), 1.88 – 1.82 (m, 2H);

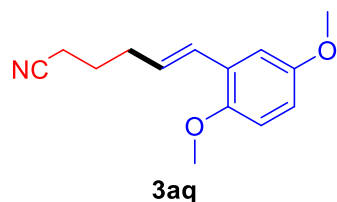

***(E)*-6-(2,5-Dimethoxyphenyl)hex-5-enitrile (3aq)**

General procedures for synthesis of the compounds 3, Method B: **3aq** (119 mg, 51%), yellow oil. The NMR data is identical to that reported in literature<sup>6</sup>. <sup>1</sup>H NMR (500 MHz, CDCl<sub>3</sub>) 6.96 (d, *J* = 3.0 Hz, 1H), 6.81 – 6.73 (m, 3H), 6.16 – 6.10 (m, 1H), 3.81 (s, 3H), 3.79 (s, 3H), 2.42 – 2.38 (m, 4H), 1.89 – 1.83 (m, 2H);

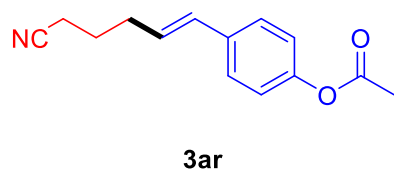

***(E)*-4-(5-Cyanopent-1-en-1-yl)phenyl acetate (3ar)**

General procedures for synthesis of the compounds 3, Method B: **3ar** (100 mg, 44%), yellow oil. The NMR data is identical to that reported in literature<sup>4</sup>. <sup>1</sup>H NMR (500 MHz, CDCl<sub>3</sub>) 7.35 (d, *J* = 8.5 Hz, 2H), 7.03 (d, *J* = 8.5 Hz, 2H), 6.45 (d, *J* = 16.0 Hz, 1H), 6.11 – 6.05 (m, 1H), 2.40 – 2.38 (m, 4H), 2.30 (s, 3H), 1.87 – 1.82 (m, 2H);

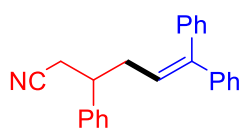

**3ba**

### ***3,6,6-Triphenylhex-5-enitrile (3ba)***

General procedures for synthesis of the compounds 3, Method A: **3ba** (243 mg, 75%), yellow oil. The NMR data is identical to that reported in literature<sup>3</sup>. <sup>1</sup>H NMR (500 MHz, CDCl<sub>3</sub>) δ 7.43 – 7.37 (m, 5H), 7.33 – 7.25 (m, 4H), 7.20 – 7.15 (m, 4H), 7.11 – 7.10 (m, 2H), 5.96 (t, *J* = 7.5 Hz, 1H), 3.16 – 3.13 (m, 1H), 2.68 – 2.56 (m, 4H);

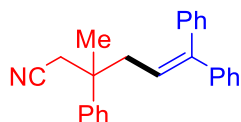

**3ca**

### ***3-Methyl-3,6,6-triphenylhex-5-enitrile (3ca)***

General procedures for synthesis of the compounds 3, Method A: **3ca** (236 mg, 70%), yellow oil. The NMR data is identical to that reported in literature<sup>3</sup>. <sup>1</sup>H NMR (500 MHz, CDCl<sub>3</sub>) δ 7.41 – 7.35 (m, 5H), 7.32 – 7.29 (m, 3H), 7.22 – 7.21 (m, 3H), 7.11 – 7.06 (m, 4H), 5.78 (t, *J* = 7.0 Hz, 1H), 2.70 – 2.67 (m, 2H), 2.61 – 2.57 (m, 2H), 1.55 (s, 3H);

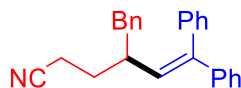

**3da**

### ***4-Benzyl-6,6-diphenylhex-5-enitrile (3da)***

General procedures for synthesis of the compounds 3, Method A: **3da** (273 mg, 81%), yellow oil. The NMR data is identical to that reported in literature<sup>3</sup>. <sup>1</sup>H NMR (500 MHz, CDCl<sub>3</sub>) δ 7.35 – 7.28 (m, 5H), 7.26 – 7.15 (m, 4H), 7.05 – 7.03 (m, 2H), 6.81 – 6.79 (m, 2H), 5.83 (d, *J* = 10.0 Hz, 1H), 2.76 – 2.66 (m, 2H), 2.55 – 2.51 (m,

1H), 2.38 – 2.32 (m, 1H), 2.19 – 2.12 (m, 1H), 1.85 – 1.81 (m, 1H), 1.71 – 1.65 (m, 1H).

## 5. References

1. Cho H; Iwama Y; Sugimoto K; Mori S; Tokuyama H. *J. Org. Chem.* **2010**; 75: 627.
2. Xu H-J; Zhu F-F; Shen Y-Y; Wan X; Feng Y-S. *Tetrahedron.* **2012**; 68: 4145.
3. Zhao B; Shi Z. *Angew. Chem. Int. Edit.* **2017**; 56: 12727.
4. Lu X Y; Xia Z J; Gao A; Liu Q L; Jiang R C; Liu C C. *J. Org. Chem.* **2021**; 86: 8829.
5. Gao J; Ye Z P; Liu Y F; He X C; Guan J P; Liu F; Chen K; Xiang H Y; Chen X Q; Yang H. *Org Lett.* **2022**; 24: 4640.
6. Gigant N; Backvall J E. *Org Lett.* **2014**; 16: 4432.

## 6. NMR spectra

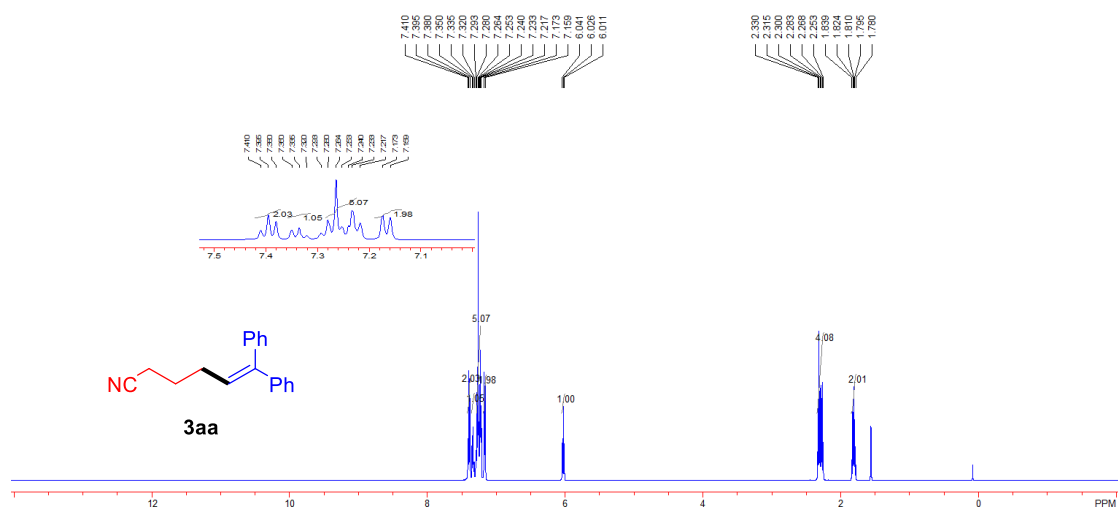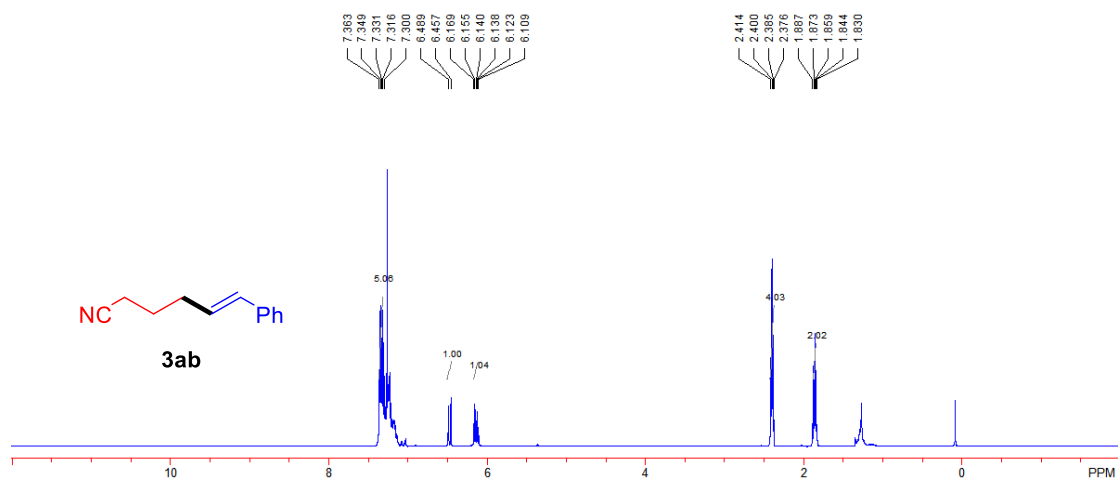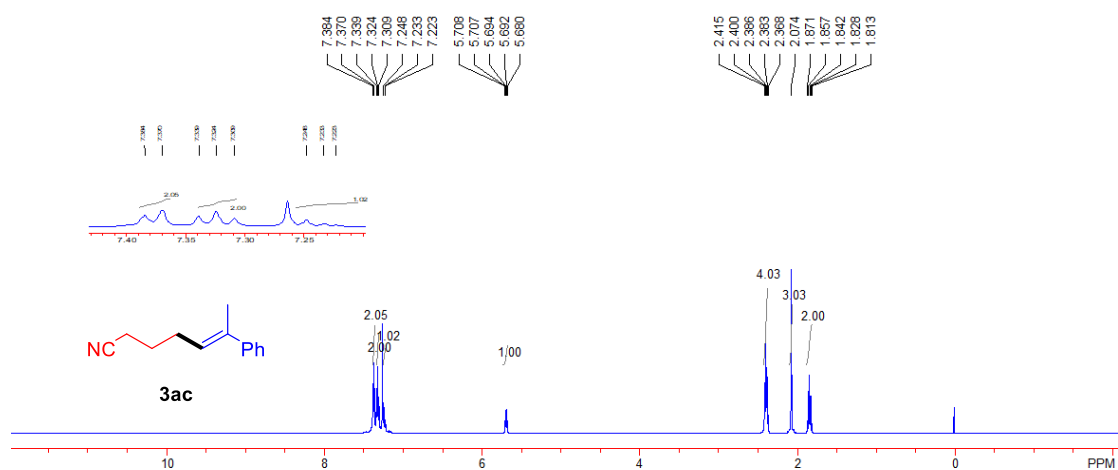



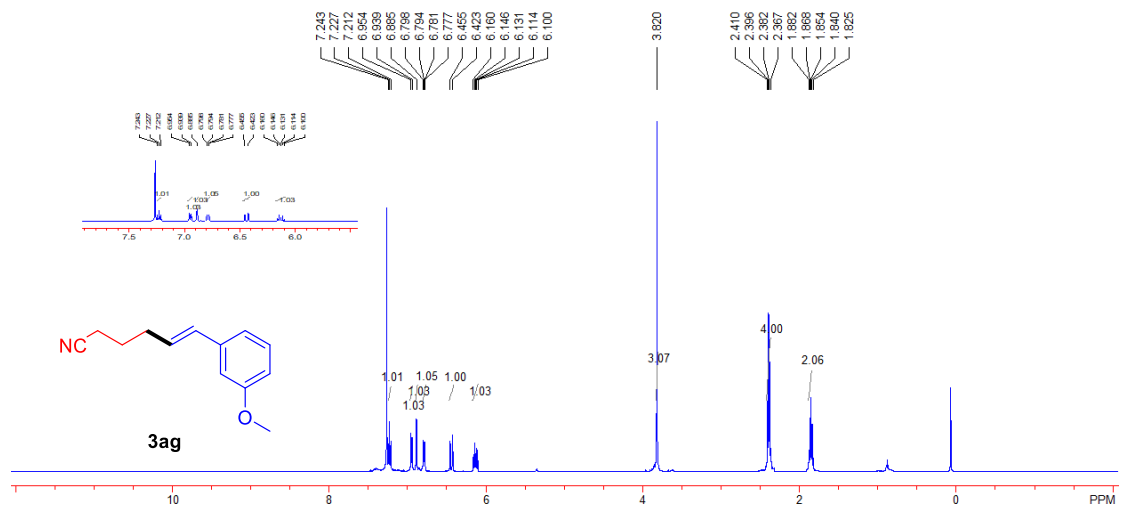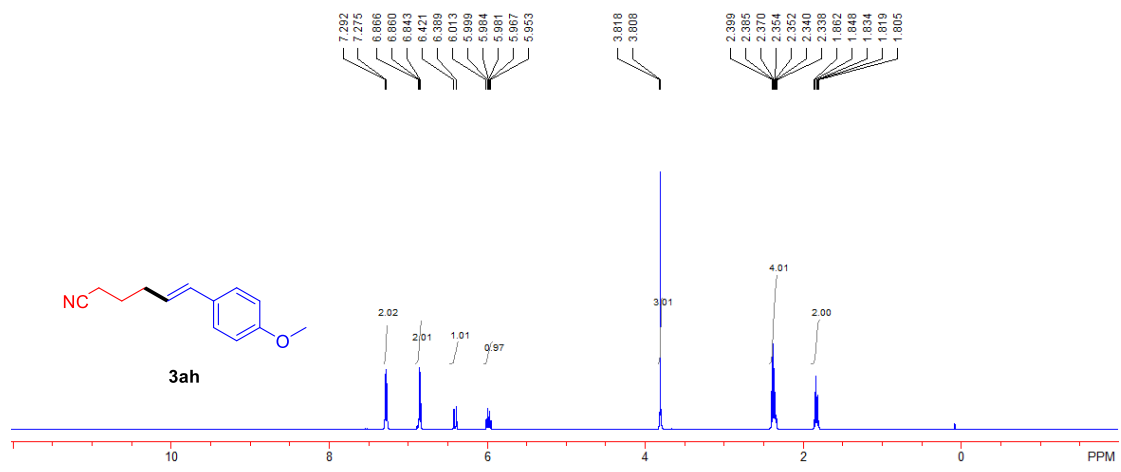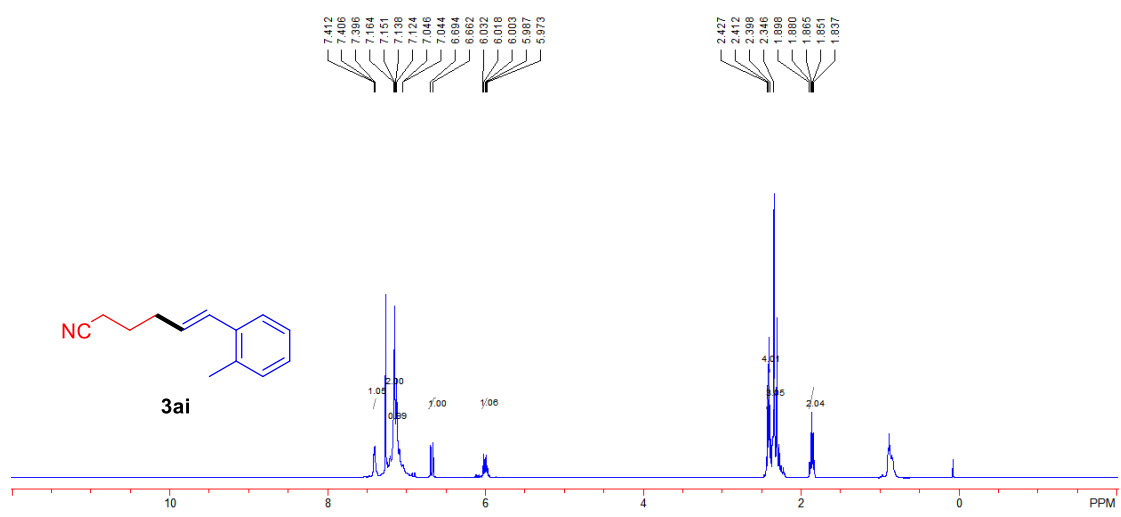

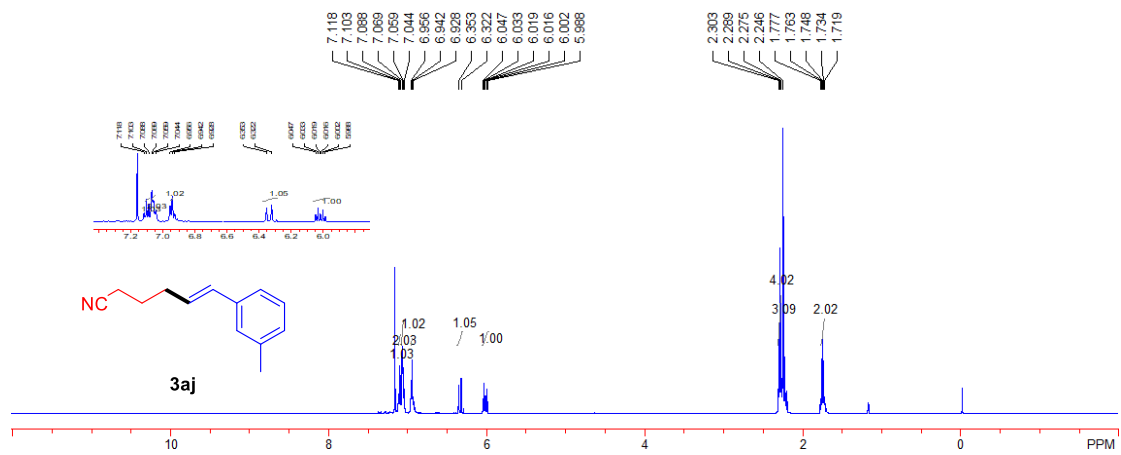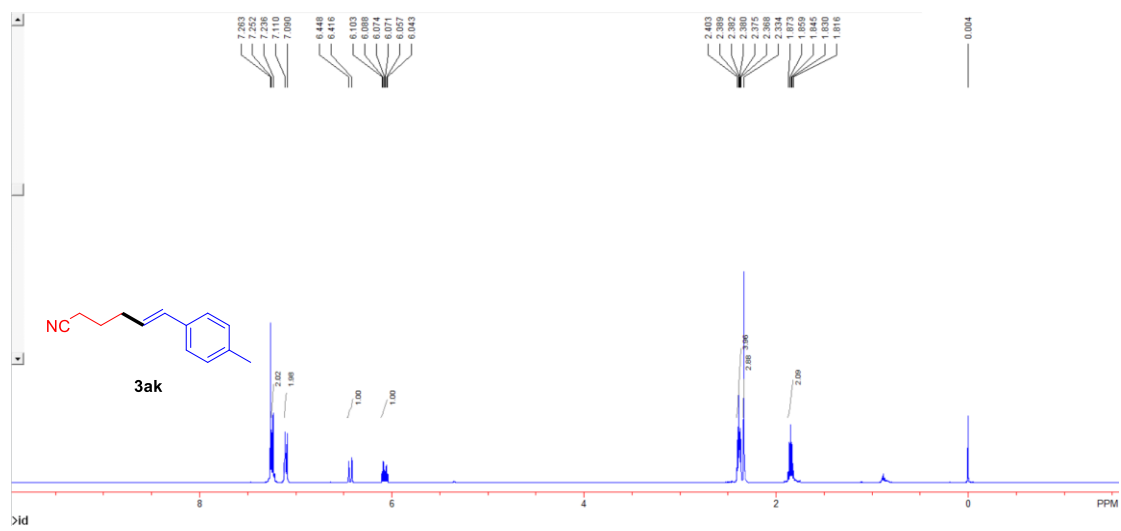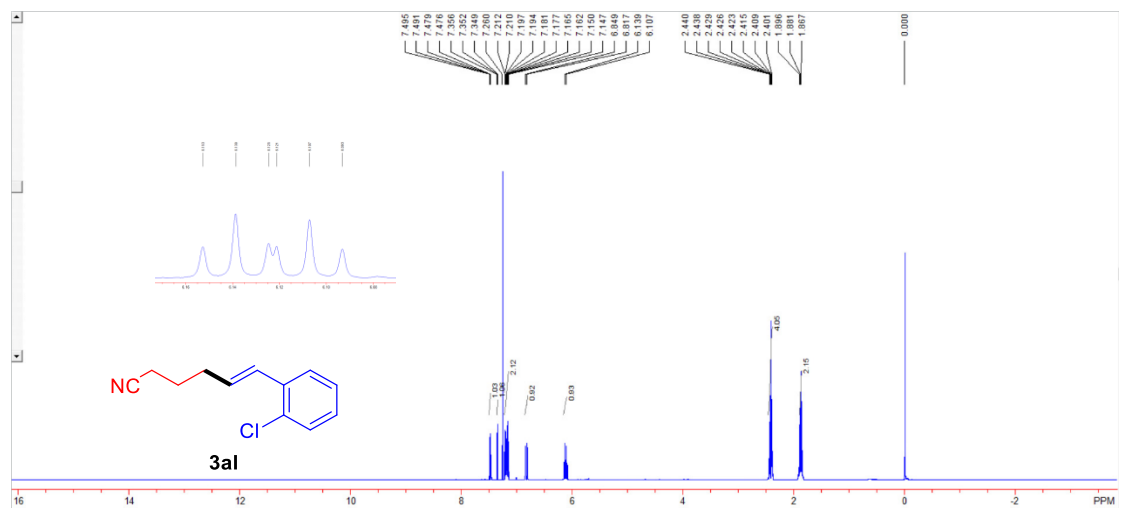



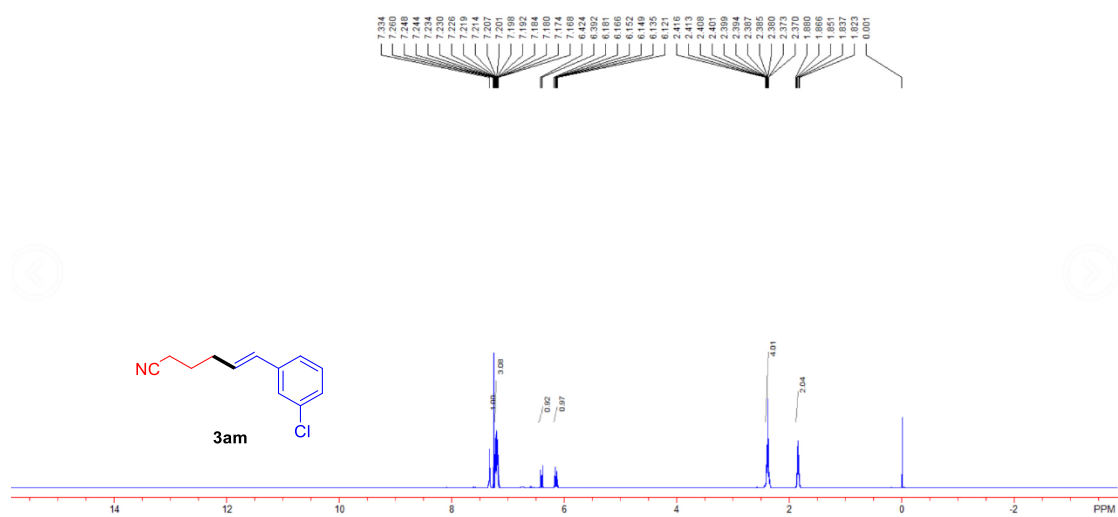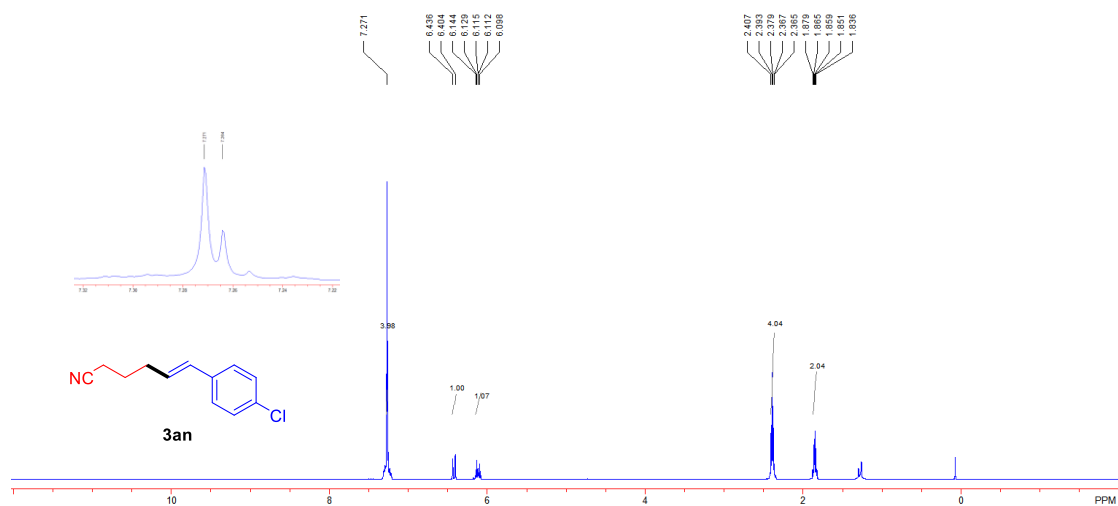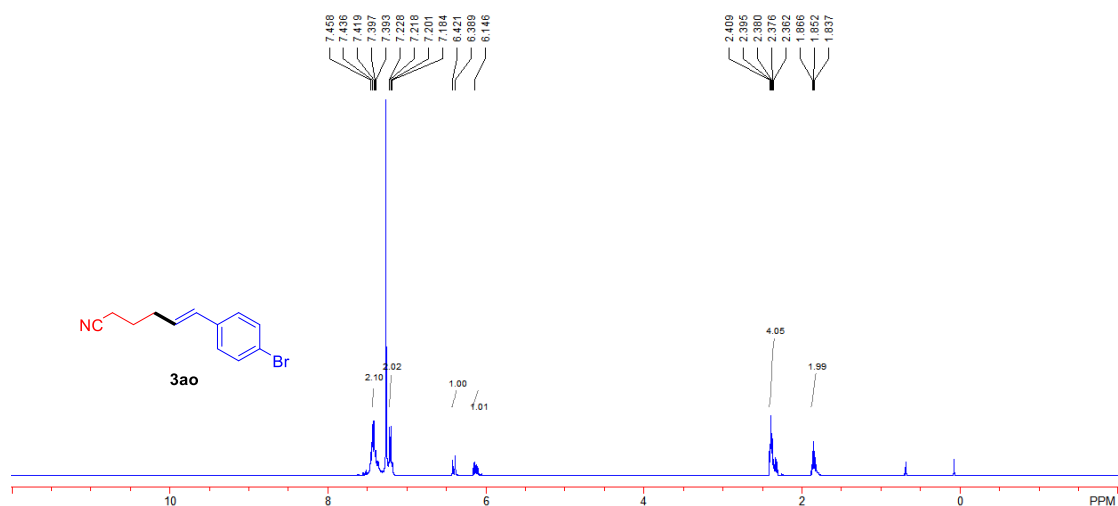

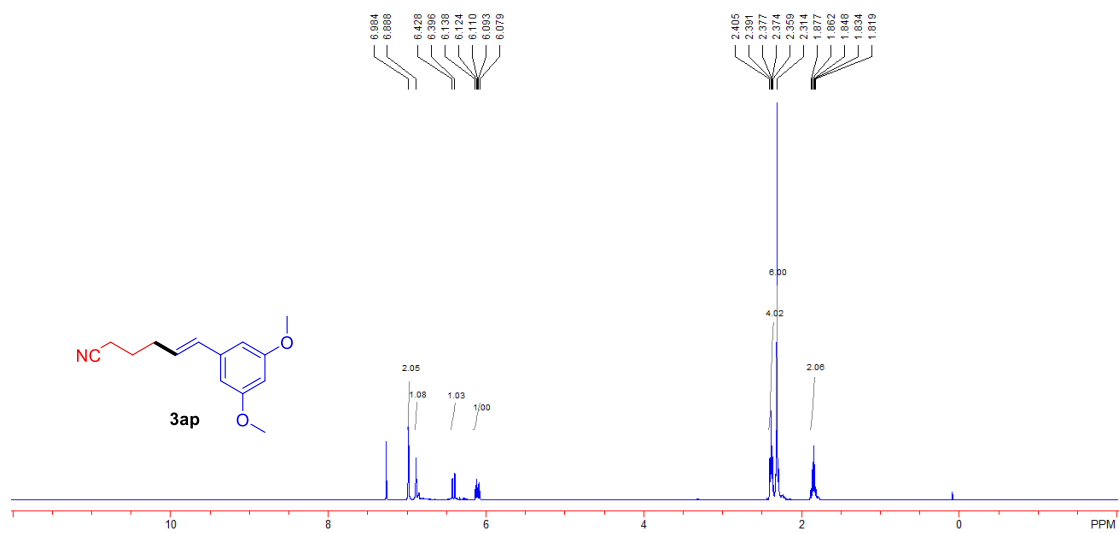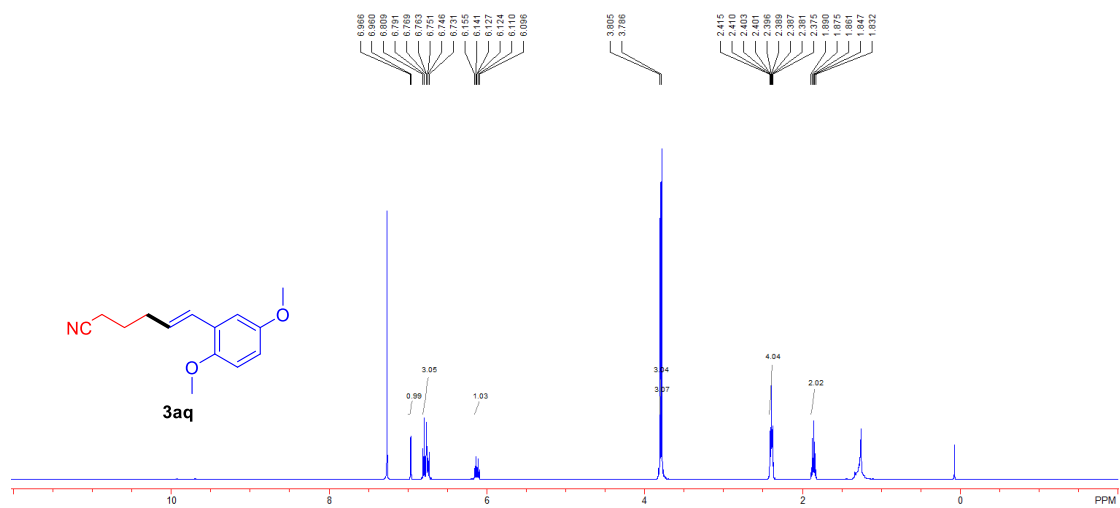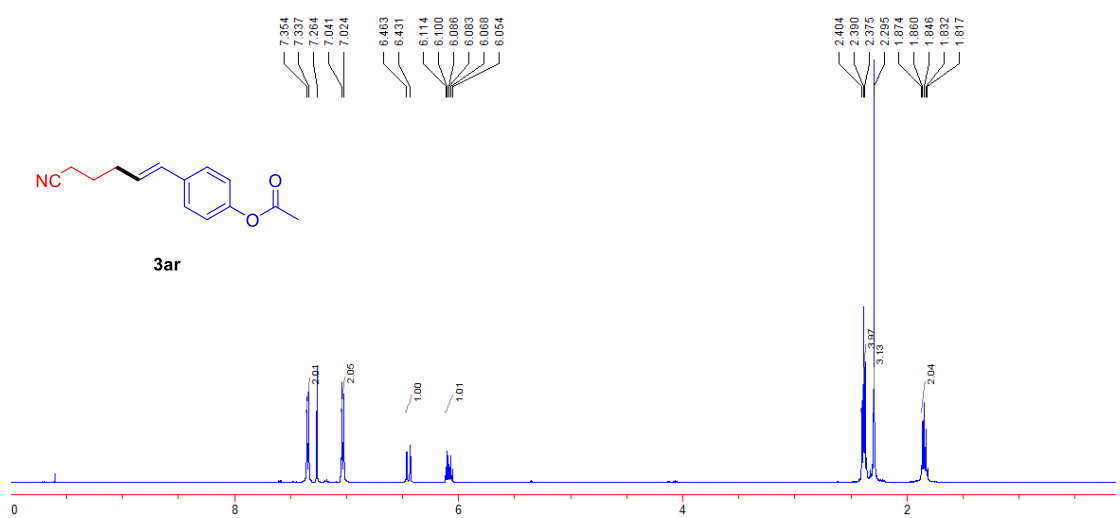

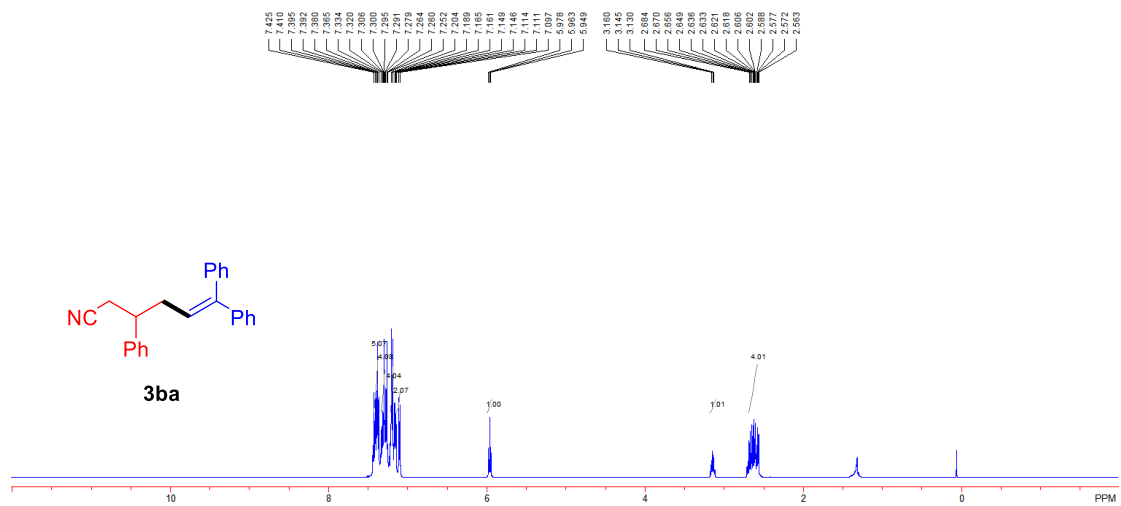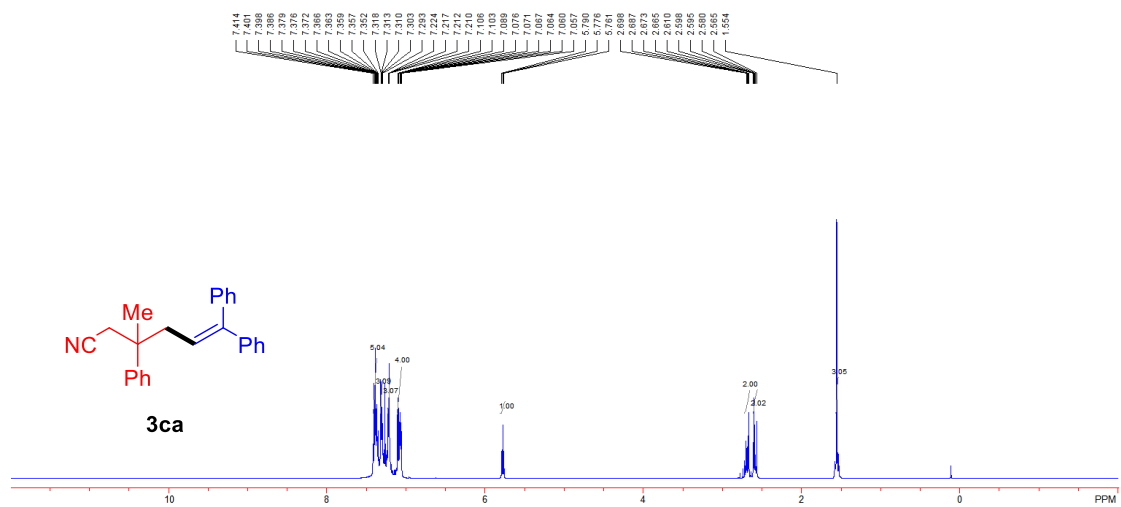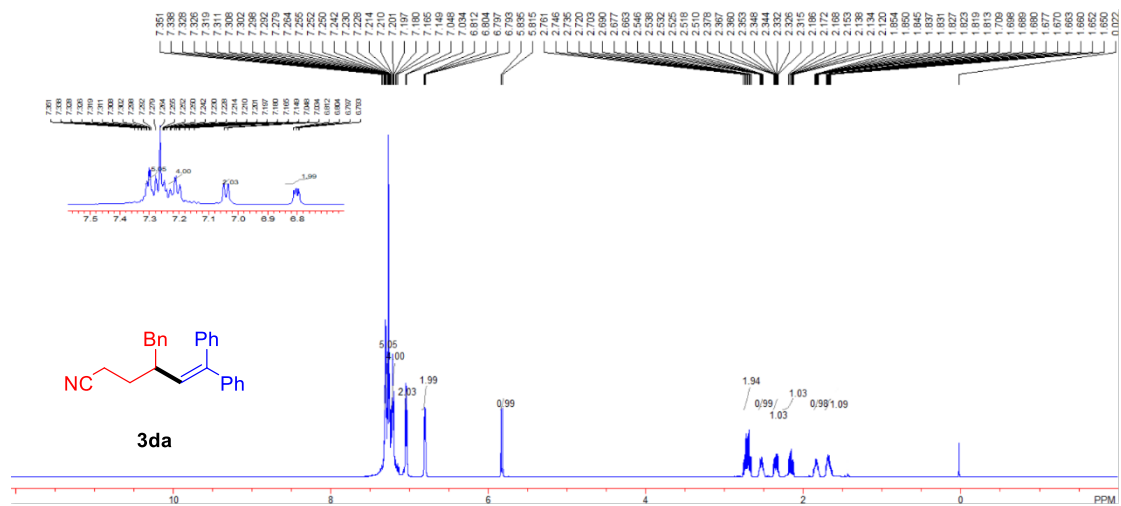

Supplement: Additional file 1 [file 1860-5397-19-68-S1.pdf]
